# Supplementary material for: BNT162b2 mRNA COVID-19 Vaccine Effectiveness in Patients with Coeliac Disease Autoimmunity: Real-World Data from Mass Vaccination Campaign
Source: MDPI journal article supplement (doi:10.3390/v15091968), 2023-09-21
Supplement: s1 [file s1]

**Table S1.** Cox regression analysis of patients with likely well-controlled coeliac disease (n = 3190) and their matched patients (n = 8, 923).

|                                         | <i>P</i> -value | Hazard Ratio | 95% Confidence Interval |       |
|-----------------------------------------|-----------------|--------------|-------------------------|-------|
|                                         |                 |              | Lower                   | Upper |
| Likely well-controlled coeliac patients | 0.34            | 0.90         | 0.71                    | 1.13  |
| BMI normal                              | Reference       |              |                         |       |
| BMI underweight                         | 0.45            | 1.14         | 0.81                    | 1.6   |
| BMI over                                | 0.11            | 0.81         | 0.63                    | 1.05  |
| BMI obese                               | 0.08            | 0.74         | 0.52                    | 1.04  |
| BMI missing                             | 0.79            | 0.94         | 0.59                    | 1.49  |
| Diabetes                                | 0.36            | 0.74         | 0.39                    | 1.42  |
| Hypertension                            | 0.05            | 0.59         | 0.35                    | 0.99  |
| Cancer                                  | 0.26            | 0.67         | 0.34                    | 1.33  |
| Cardiovascular disease                  | 0.45            | 0.73         | 0.32                    | 1.66  |
| Chronic Kidney Disease                  | 0.76            | 0.91         | 0.48                    | 1.7   |
| Immunocompromised                       | 0.06            | 0.42         | 0.17                    | 1.05  |

**Table S2.** Cox regression analysis for patients with near-certain coeliac disease (n = 2310) and their matched patients (n = 6423).

|                              | <i>p</i> -value | Hazard Ratio | 95% Confidence Interval |       |
|------------------------------|-----------------|--------------|-------------------------|-------|
|                              |                 |              | Lower                   | Upper |
| Near-certain Coeliac disease | 0.13            | 0.81         | 0.62                    | 1.07  |
| BMI normal                   | Reference       |              |                         |       |
| BMI underweight              | 0.27            | 1.25         | 0.84                    | 1.90  |
| BMI over                     | 0.42            | 0.89         | 0.67                    | 1.19  |
| BMI obese                    | 0.08            | 0.69         | 0.46                    | 1.04  |
| BMI missing                  | 0.14            | 0.62         | 0.33                    | 1.18  |
| Diabetes                     | 0.67            | 1.14         | 0.59                    | 2.21  |
| Hypertension                 | 0.03            | 0.51         | 0.28                    | 0.93  |
| Cancer                       | 0.28            | 0.63         | 0.27                    | 1.46  |
| Cardiovascular disease       | 0.74            | 0.86         | 0.34                    | 2.14  |
| Chronic Kidney Disease       | 0.37            | 0.69         | 0.32                    | 1.54  |
| Immunocompromised            | 0.16            | 0.43         | 0.13                    | 1.40  |

**Table S3.** Cox regression analysis for patients with likely not well-controlled coeliac disease (n = 162) and their matched patients (n = 458).

|                                             | <i>P</i> -value | Hazard Ratio | 95% Confidence Interval |       |
|---------------------------------------------|-----------------|--------------|-------------------------|-------|
|                                             |                 |              | Lower                   | Upper |
| Likely not well-controlled coeliac patients | 0.32            | 0.57         | 0.19                    | 1.71  |
| BMI normal                                  | 0.20            |              |                         |       |
| BMI underweight                             | 0.02            | 5.17         | 1.36                    | 19.64 |
| BMI over                                    | 0.56            | 1.37         | 0.48                    | 3.87  |
| BMI obese                                   | 0.52            | 1.47         | 0.46                    | 4.72  |
| BMI missing                                 | 0.96            | 1.05         | 0.13                    | 8.61  |
| Diabetes                                    | 0.66            | 0.62         | 0.08                    | 5.14  |

|                        |      |      |      |       |
|------------------------|------|------|------|-------|
| Hypertension           | 0.75 | 0.79 | 0.18 | 3.44  |
| Cancer                 | 0.60 | 0.54 | 0.05 | 5.34  |
| Cardiovascular disease | 0.90 | 1.16 | 0.12 | 11.14 |
| Chronic Kidney Disease | 0.62 | 1.56 | 0.26 | 9.11  |
| Immunocompromised      | 0.30 | 2.48 | 0.43 | 14.06 |

**Table S4.** Cox regression analysis for patients with newly diagnosed coeliac disease (n = 162) and their matched patients (n = 458).

|                                         | <i>P</i> -value | Hazard Ratio | 95% Confidence Interval |       |
|-----------------------------------------|-----------------|--------------|-------------------------|-------|
|                                         |                 |              | Lower                   | Upper |
| Likely newly diagnosed coeliac patients | 0.98            | 0.99         | .51                     | 1.93  |
| BMI normal                              | 0.63            |              |                         |       |
| BMI underweight                         | 0.76            | 0.80         | 0.19                    | 3.40  |
| BMI over                                | 0.35            | 1.36         | 0.71                    | 2.62  |
| BMI obese                               | 0.42            | 0.61         | 0.18                    | 2.04  |
| BMI missing                             | 0.57            | 0.66         | 0.15                    | 2.81  |
| Diabetes                                | 0.98            | 0.00         | 0.00                    |       |
| Hypertension                            | 0.27            | 0.32         | 0.04                    | 2.41  |
| Cancer                                  | 0.98            | 0.00         | 0.00                    | .     |
| Cardiovascular disease                  | 0.12            | 3.20         | 0.74                    | 13.90 |
| Chronic Kidney Disease                  | 0.98            | 0.00         | 0.00                    | .     |
| Immunocompromised                       | 0.52            | 1.94         | 0.26                    | 14.23 |
